# Supplementary material for: Efficacy of using radar-derived factors in landslide susceptibility analysis: case study of Koslanda, Sri Lanka
Source: Copernicus journal article supplement (doi:10.5194/nhess-19-1881-2019), 2019-08-28
Supplement: Supplementary file 1 [file nhess-19-1881-2019-supplement.zip]

Archive with 7 entries (6 files):
- nhess-19-1881-2019-supplement-title-page.pdf
- Supplement/
- Supplement/S4.docx
- Supplement/S3.tif
- Supplement/S2.tif
- Supplement/Captions for the Supplements.docx
- Supplement/S1.tif
