# Supplementary material for: Efficacy of using radar-derived factors in landslide susceptibility analysis: case study of Koslanda, Sri Lanka
Source: Copernicus journal article supplement (doi:10.5194/nhess-19-1881-2019), 2019-08-28
Supplement: Supplementary file 1 [file nhess-19-1881-2019-supplement.zip › nhess-19-1881-2019-supplement-title-page.pdf]

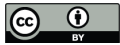

## *Supplement of*

# **Efficacy of using radar-derived factors in landslide susceptibility analysis: case study of Koslanda, Sri Lanka**

**Ahangama Kankanamge Rasika Nishamanie Ranasinghe et al.**

*Correspondence to:* Ahangama Kankanamge Rasika Nishamanie Ranasinghe ([nishamanie@geo.sab.ac.lk](mailto:nishamanie@geo.sab.ac.lk))

- [nhess-19-1881-2019-supplement-title-page.pdf](#)
- Supplement
  - Captions for the Supplements.docx
  - S1.tif
  - S2.tif
  - S3.tif
  - S4.docx

The copyright of individual parts of the supplement might differ from the CC BY 4.0 License.
