# Supplementary material for: Efficacy of using radar-derived factors in landslide susceptibility analysis: case study of Koslanda, Sri Lanka
Source: Copernicus journal article supplement (doi:10.5194/nhess-19-1881-2019), 2019-08-28
Supplement: Supplementary file 1 [file nhess-19-1881-2019-supplement.zip › Supplement/Captions for the Supplements.docx]

Captions for the Supplements

Figure S1: Topographical factors left to right & top to bottom as elevation, slope, aspect, planar & profile curvature, and surface roughness derived from DEM and radar image that used for landslide susceptibility analysis.

**Figure S2:** Hydrological factors left to right & top to bottom as distance to hydrology, topographical wetness index (TWI) and monthly average rainfall for landslide susceptibility analysis.

**Figure S3:** Predisposing factorsleft to right & top to bottom as soil factors, soil moisture index (SMI) from optical approach and delta index from radar approach, land use factors as land use classes from Sentinel – 2A (10m resolution) image, and estimated forest biomass from TerraSAR-X (3m resolution) radar image, and geological factors as 1:100000 scale geological map from GSMB, Sri Lanka and lineament density with the lineaments derived from 10m resolution Sentinel -2 satellite image used for landslide susceptibility analysis.

**Figure S4:** Questionnaire Survey for calculating the comparative weights in multi criteria decision analysis (MCDA) based on analytic hierarchy process (AHP) technique.
