# Supplementary material for: Efficacy of using radar-derived factors in landslide susceptibility analysis: case study of Koslanda, Sri Lanka
Source: Copernicus journal article supplement (doi:10.5194/nhess-19-1881-2019), 2019-08-28
Supplement: Supplementary file 1 [file nhess-19-1881-2019-supplement.zip › Supplement/S4.docx]

# Questionnaire Survey for MCDA based on AHP technique

**Questionnaire for MCDA with AHP technique**

**Questionnaire Survey**

**PhD Research**

**University of Moratuwa, Sri Lanka**

NO:

**RESEARCH TITLE:**

INTEGRATION OF RADAR AND OPTICAL REMOTE SENSING FOR LANDSLIDE PREDICTION. A CASE STUDY OF KOSLANDA, SRI LANKA

The importance of the criterion for landslide predictions is expected. The information derived from questionnaire survey will only be used for the above research. We thank you very much for your valuable cooperation.

1. Designation: .................................................
2. Answer following questions according to the given instructions.

| **Degree** | **Description of pair wise comparison judgment** |
| --- | --- |
| 1 | Equally important |
| 3 | Moderately important |
| 5 | Strongly important |
| 7 | Very strongly important |
| 9 | Extremely important |

2, 4, 6, 8 are intermediate values.

Main Criteria of the Research,

A – Elevation

B – Slope

C – Aspect

D – Planar Curvature

E – Profile Curvature

F – Topographical Wetness Index (TWI)

G – Land use

H – Lineament Density

I – Distance to Hydrology

J – Soil Moisture Index (SMI)

K – Geology

L – Rainfall

M – Surface Soil Moisture

N – Surface Roughness

O – Forest Biomass

**Example: -**

When you consider the criteria A is **strongly important** than B, then mark the suitability degree of the table as follows:

| **A** | **9** | **7** | **5** | **3** | **1** | **3** | **5** | **7** | **9** | **B** |
| --- | --- | --- | --- | --- | --- | --- | --- | --- | --- | --- |

When you consider the criteria B is **strongly important** than A, then mark the suitability degree of the table as follows:

| **A** | **9** | **7** | **5** | **3** | **1** | **3** | **5** | **7** | **9** | **B** |
| --- | --- | --- | --- | --- | --- | --- | --- | --- | --- | --- |

According to your preference, mark your desired degree of importance for the desired criterion.

| A | **9** | **7** | **5** | **3** | **1** | **3** | **5** | **7** | **9** | B |
| --- | --- | --- | --- | --- | --- | --- | --- | --- | --- | --- |
| A | **9** | **7** | **5** | **3** | **1** | **3** | **5** | **7** | **9** | C |
| A | **9** | **7** | **5** | **3** | **1** | **3** | **5** | **7** | **9** | D |
| A | **9** | **7** | **5** | **3** | **1** | **3** | **5** | **7** | **9** | E |
| A | **9** | **7** | **5** | **3** | **1** | **3** | **5** | **7** | **9** | F |
| A | **9** | **7** | **5** | **3** | **1** | **3** | **5** | **7** | **9** | G |
| A | **9** | **7** | **5** | **3** | **1** | **3** | **5** | **7** | **9** | H |
| A | **9** | **7** | **5** | **3** | **1** | **3** | **5** | **7** | **9** | I |
| A | **9** | **7** | **5** | **3** | **1** | **3** | **5** | **7** | **9** | J |
| A | **9** | **7** | **5** | **3** | **1** | **3** | **5** | **7** | **9** | K |
| A | **9** | **7** | **5** | **3** | **1** | **3** | **5** | **7** | **9** | L |
| A | **9** | **7** | **5** | **3** | **1** | **3** | **5** | **7** | **9** | M |
| A | **9** | **7** | **5** | **3** | **1** | **3** | **5** | **7** | **9** | N |
| A | **9** | **7** | **5** | **3** | **1** | **3** | **5** | **7** | **9** | O |

.

| B | **9** | **7** | **5** | **3** | **1** | **3** | **5** | **7** | **9** | C |
| --- | --- | --- | --- | --- | --- | --- | --- | --- | --- | --- |
| B | **9** | **7** | **5** | **3** | **1** | **3** | **5** | **7** | **9** | D |
| B | **9** | **7** | **5** | **3** | **1** | **3** | **5** | **7** | **9** | E |
| B | **9** | **7** | **5** | **3** | **1** | **3** | **5** | **7** | **9** | F |
| B | **9** | **7** | **5** | **3** | **1** | **3** | **5** | **7** | **9** | G |
| B | **9** | **7** | **5** | **3** | **1** | **3** | **5** | **7** | **9** | H |
| B | **9** | **7** | **5** | **3** | **1** | **3** | **5** | **7** | **9** | I |
| B | **9** | **7** | **5** | **3** | **1** | **3** | **5** | **7** | **9** | J |
| B | **9** | **7** | **5** | **3** | **1** | **3** | **5** | **7** | **9** | K |
| B | **9** | **7** | **5** | **3** | **1** | **3** | **5** | **7** | **9** | L |
| B | **9** | **7** | **5** | **3** | **1** | **3** | **5** | **7** | **9** | M |
| B | **9** | **7** | **5** | **3** | **1** | **3** | **5** | **7** | **9** | N |
| B | **9** | **7** | **5** | **3** | **1** | **3** | **5** | **7** | **9** | O |

| C | **9** | **7** | **5** | **3** | **1** | **3** | **5** | **7** | **9** | D |
| --- | --- | --- | --- | --- | --- | --- | --- | --- | --- | --- |
| C | **9** | **7** | **5** | **3** | **1** | **3** | **5** | **7** | **9** | E |
| C | **9** | **7** | **5** | **3** | **1** | **3** | **5** | **7** | **9** | F |
| C | **9** | **7** | **5** | **3** | **1** | **3** | **5** | **7** | **9** | G |
| C | **9** | **7** | **5** | **3** | **1** | **3** | **5** | **7** | **9** | H |
| C | **9** | **7** | **5** | **3** | **1** | **3** | **5** | **7** | **9** | I |
| C | **9** | **7** | **5** | **3** | **1** | **3** | **5** | **7** | **9** | J |
| C | **9** | **7** | **5** | **3** | **1** | **3** | **5** | **7** | **9** | K |
| C | **9** | **7** | **5** | **3** | **1** | **3** | **5** | **7** | **9** | L |
| C | **9** | **7** | **5** | **3** | **1** | **3** | **5** | **7** | **9** | M |
| C | **9** | **7** | **5** | **3** | **1** | **3** | **5** | **7** | **9** | N |
| C | **9** | **7** | **5** | **3** | **1** | **3** | **5** | **7** | **9** | O |

| D | **9** | **7** | **5** | **3** | **1** | **3** | **5** | **7** | **9** | E |
| --- | --- | --- | --- | --- | --- | --- | --- | --- | --- | --- |
| D | **9** | **7** | **5** | **3** | **1** | **3** | **5** | **7** | **9** | F |
| D | **9** | **7** | **5** | **3** | **1** | **3** | **5** | **7** | **9** | G |
| D | **9** | **7** | **5** | **3** | **1** | **3** | **5** | **7** | **9** | H |
| D | **9** | **7** | **5** | **3** | **1** | **3** | **5** | **7** | **9** | I |
| D | **9** | **7** | **5** | **3** | **1** | **3** | **5** | **7** | **9** | J |
| D | **9** | **7** | **5** | **3** | **1** | **3** | **5** | **7** | **9** | K |
| D | **9** | **7** | **5** | **3** | **1** | **3** | **5** | **7** | **9** | L |
| D | **9** | **7** | **5** | **3** | **1** | **3** | **5** | **7** | **9** | M |
| D | **9** | **7** | **5** | **3** | **1** | **3** | **5** | **7** | **9** | N |
| D | **9** | **7** | **5** | **3** | **1** | **3** | **5** | **7** | **9** | O |

| E | **9** | **7** | **5** | **3** | **1** | **3** | **5** | **7** | **9** | F |
| --- | --- | --- | --- | --- | --- | --- | --- | --- | --- | --- |
| E | **9** | **7** | **5** | **3** | **1** | **3** | **5** | **7** | **9** | G |
| E | **9** | **7** | **5** | **3** | **1** | **3** | **5** | **7** | **9** | H |
| E | **9** | **7** | **5** | **3** | **1** | **3** | **5** | **7** | **9** | I |
| E | **9** | **7** | **5** | **3** | **1** | **3** | **5** | **7** | **9** | J |
| E | **9** | **7** | **5** | **3** | **1** | **3** | **5** | **7** | **9** | K |
| E | **9** | **7** | **5** | **3** | **1** | **3** | **5** | **7** | **9** | L |
| E | **9** | **7** | **5** | **3** | **1** | **3** | **5** | **7** | **9** | M |
| E | **9** | **7** | **5** | **3** | **1** | **3** | **5** | **7** | **9** | N |
| E | **9** | **7** | **5** | **3** | **1** | **3** | **5** | **7** | **9** | O |

| F | **9** | **7** | **5** | **3** | **1** | **3** | **5** | **7** | **9** | G |
| --- | --- | --- | --- | --- | --- | --- | --- | --- | --- | --- |
| F | **9** | **7** | **5** | **3** | **1** | **3** | **5** | **7** | **9** | H |
| F | **9** | **7** | **5** | **3** | **1** | **3** | **5** | **7** | **9** | I |
| F | **9** | **7** | **5** | **3** | **1** | **3** | **5** | **7** | **9** | J |
| F | **9** | **7** | **5** | **3** | **1** | **3** | **5** | **7** | **9** | K |
| F | **9** | **7** | **5** | **3** | **1** | **3** | **5** | **7** | **9** | L |
| F | **9** | **7** | **5** | **3** | **1** | **3** | **5** | **7** | **9** | M |
| F | **9** | **7** | **5** | **3** | **1** | **3** | **5** | **7** | **9** | N |
| F | **9** | **7** | **5** | **3** | **1** | **3** | **5** | **7** | **9** | O |

| G | **9** | **7** | **5** | **3** | **1** | **3** | **5** | **7** | **9** | H |
| --- | --- | --- | --- | --- | --- | --- | --- | --- | --- | --- |
| G | **9** | **7** | **5** | **3** | **1** | **3** | **5** | **7** | **9** | I |
| G | **9** | **7** | **5** | **3** | **1** | **3** | **5** | **7** | **9** | J |
| G | **9** | **7** | **5** | **3** | **1** | **3** | **5** | **7** | **9** | K |
| G | **9** | **7** | **5** | **3** | **1** | **3** | **5** | **7** | **9** | L |
| G | **9** | **7** | **5** | **3** | **1** | **3** | **5** | **7** | **9** | M |
| G | **9** | **7** | **5** | **3** | **1** | **3** | **5** | **7** | **9** | N |
| G | **9** | **7** | **5** | **3** | **1** | **3** | **5** | **7** | **9** | O |

| H | **9** | **7** | **5** | **3** | **1** | **3** | **5** | **7** | **9** | I |
| --- | --- | --- | --- | --- | --- | --- | --- | --- | --- | --- |
| H | **9** | **7** | **5** | **3** | **1** | **3** | **5** | **7** | **9** | J |
| H | **9** | **7** | **5** | **3** | **1** | **3** | **5** | **7** | **9** | K |
| H | **9** | **7** | **5** | **3** | **1** | **3** | **5** | **7** | **9** | L |
| H | **9** | **7** | **5** | **3** | **1** | **3** | **5** | **7** | **9** | M |
| H | **9** | **7** | **5** | **3** | **1** | **3** | **5** | **7** | **9** | N |
| H | **9** | **7** | **5** | **3** | **1** | **3** | **5** | **7** | **9** | O |

| I | **9** | **7** | **5** | **3** | **1** | **3** | **5** | **7** | **9** | J |
| --- | --- | --- | --- | --- | --- | --- | --- | --- | --- | --- |
| I | **9** | **7** | **5** | **3** | **1** | **3** | **5** | **7** | **9** | K |
| I | **9** | **7** | **5** | **3** | **1** | **3** | **5** | **7** | **9** | L |
| I | **9** | **7** | **5** | **3** | **1** | **3** | **5** | **7** | **9** | M |
| I | **9** | **7** | **5** | **3** | **1** | **3** | **5** | **7** | **9** | N |
| I | **9** | **7** | **5** | **3** | **1** | **3** | **5** | **7** | **9** | O |

| J | **9** | **7** | **5** | **3** | **1** | **3** | **5** | **7** | **9** | K |
| --- | --- | --- | --- | --- | --- | --- | --- | --- | --- | --- |
| J | **9** | **7** | **5** | **3** | **1** | **3** | **5** | **7** | **9** | L |
| J | **9** | **7** | **5** | **3** | **1** | **3** | **5** | **7** | **9** | M |
| J | **9** | **7** | **5** | **3** | **1** | **3** | **5** | **7** | **9** | N |
| J | **9** | **7** | **5** | **3** | **1** | **3** | **5** | **7** | **9** | O |

| K | **9** | **7** | **5** | **3** | **1** | **3** | **5** | **7** | **9** | L |
| --- | --- | --- | --- | --- | --- | --- | --- | --- | --- | --- |
| K | **9** | **7** | **5** | **3** | **1** | **3** | **5** | **7** | **9** | M |
| K | **9** | **7** | **5** | **3** | **1** | **3** | **5** | **7** | **9** | N |
| K | **9** | **7** | **5** | **3** | **1** | **3** | **5** | **7** | **9** | O |

| L | **9** | **7** | **5** | **3** | **1** | **3** | **5** | **7** | **9** | M |
| --- | --- | --- | --- | --- | --- | --- | --- | --- | --- | --- |
| L | **9** | **7** | **5** | **3** | **1** | **3** | **5** | **7** | **9** | N |
| L | **9** | **7** | **5** | **3** | **1** | **3** | **5** | **7** | **9** | O |

| M | **9** | **7** | **5** | **3** | **1** | **3** | **5** | **7** | **9** | N |
| --- | --- | --- | --- | --- | --- | --- | --- | --- | --- | --- |
| M | **9** | **7** | **5** | **3** | **1** | **3** | **5** | **7** | **9** | O |

| N | **9** | **7** | **5** | **3** | **1** | **3** | **5** | **7** | **9** | O |
| --- | --- | --- | --- | --- | --- | --- | --- | --- | --- | --- |
