# Supplementary figures and images for: Efficacy of using radar-derived factors in landslide susceptibility analysis: case study of Koslanda, Sri Lanka
Source: Copernicus journal article supplement (doi:10.5194/nhess-19-1881-2019), 2019-08-28

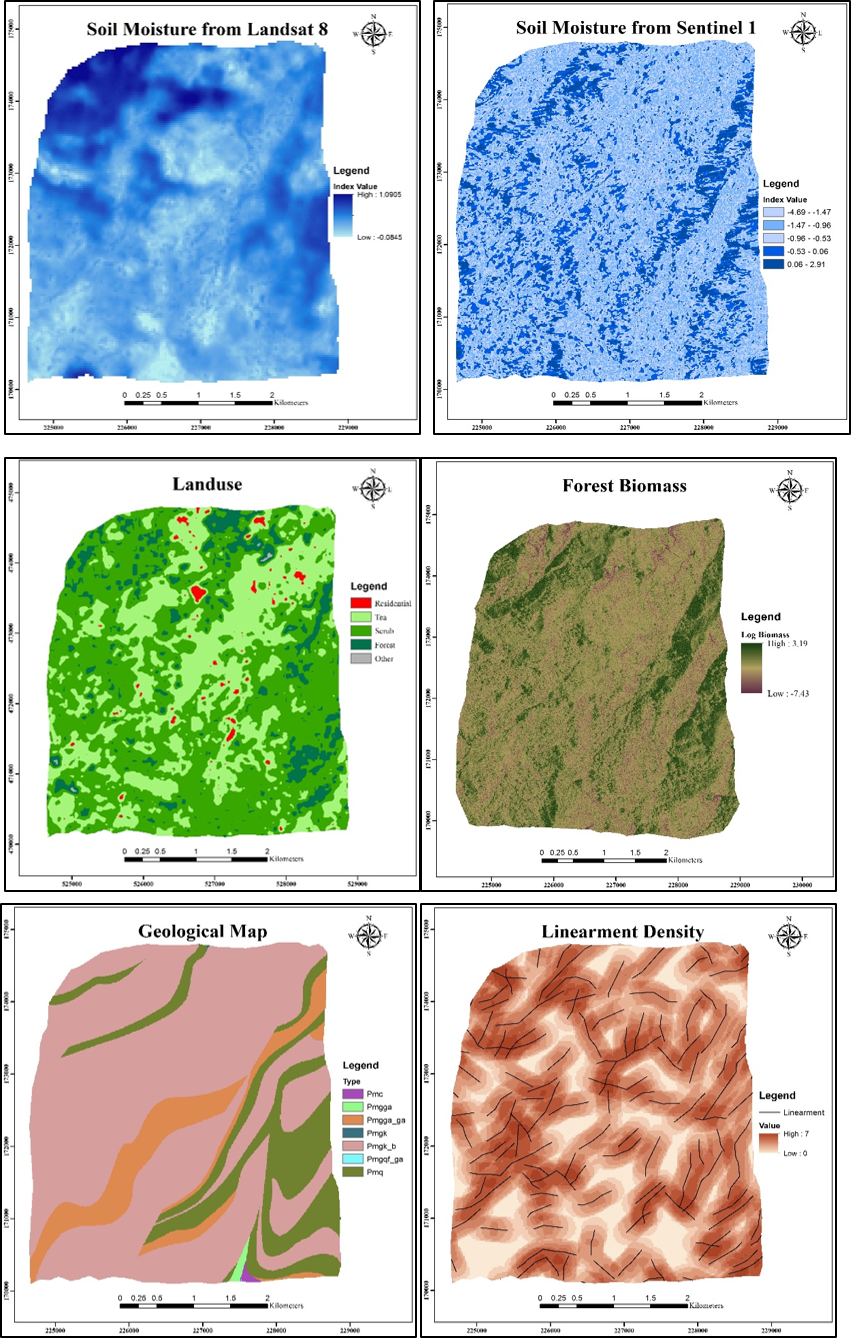

Supplement: Supplementary file 1 [file nhess-19-1881-2019-supplement.zip › Supplement/S3.tif]

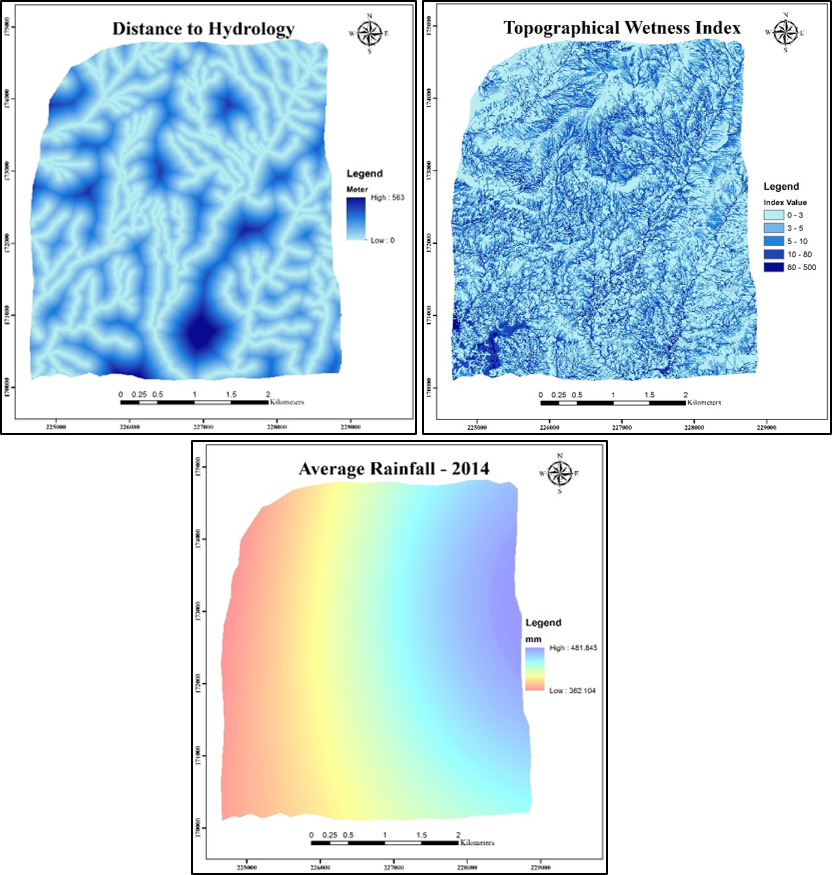

Supplement: Supplementary file 1 [file nhess-19-1881-2019-supplement.zip › Supplement/S2.tif]

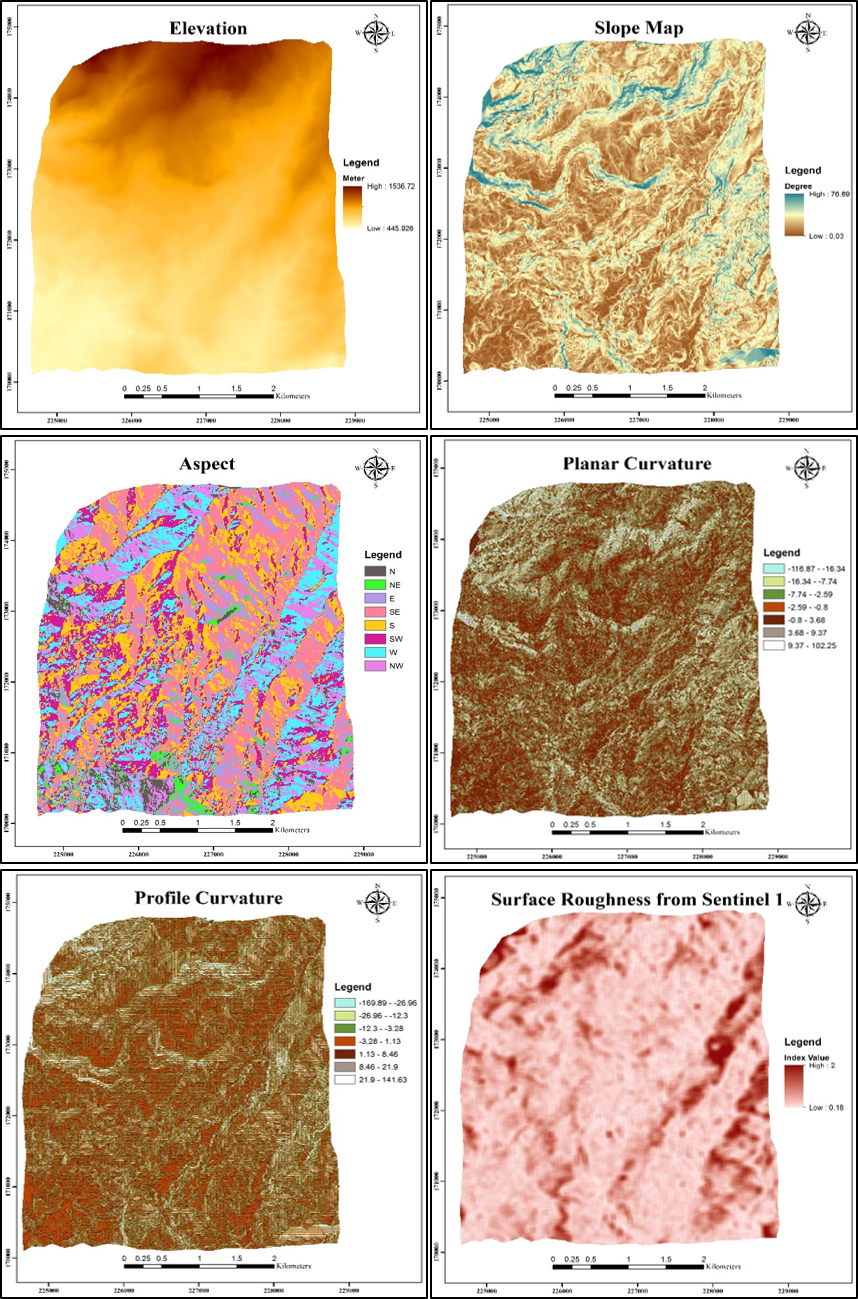

Supplement: Supplementary file 1 [file nhess-19-1881-2019-supplement.zip › Supplement/S1.tif]
